# Supplementary material for: Activation of AKT induces EZH2-mediated β-catenin trimethylation in colorectal cancer
Source: PubMed Central journal article supplement — iScience. 2023 Aug 16;26(9):107630. doi: 10.1016/j.isci.2023.107630 (PMC10475482; doi:10.1016/j.isci.2023.107630), 2023-08-16
Supplement: mmc1.pdf [file mmc1.pdf]

**iScience, Volume 26**

**Supplemental information**

**Activation of AKT induces  
EZH2-mediated  $\beta$ -catenin trimethylation  
in colorectal cancer**

**Ahmed H. Ghobashi, Truc T. Vuong, Jane W. Kimani, Christopher A. Ladaika, Peter C. Hollenhorst, and Heather M. O'Hagan**

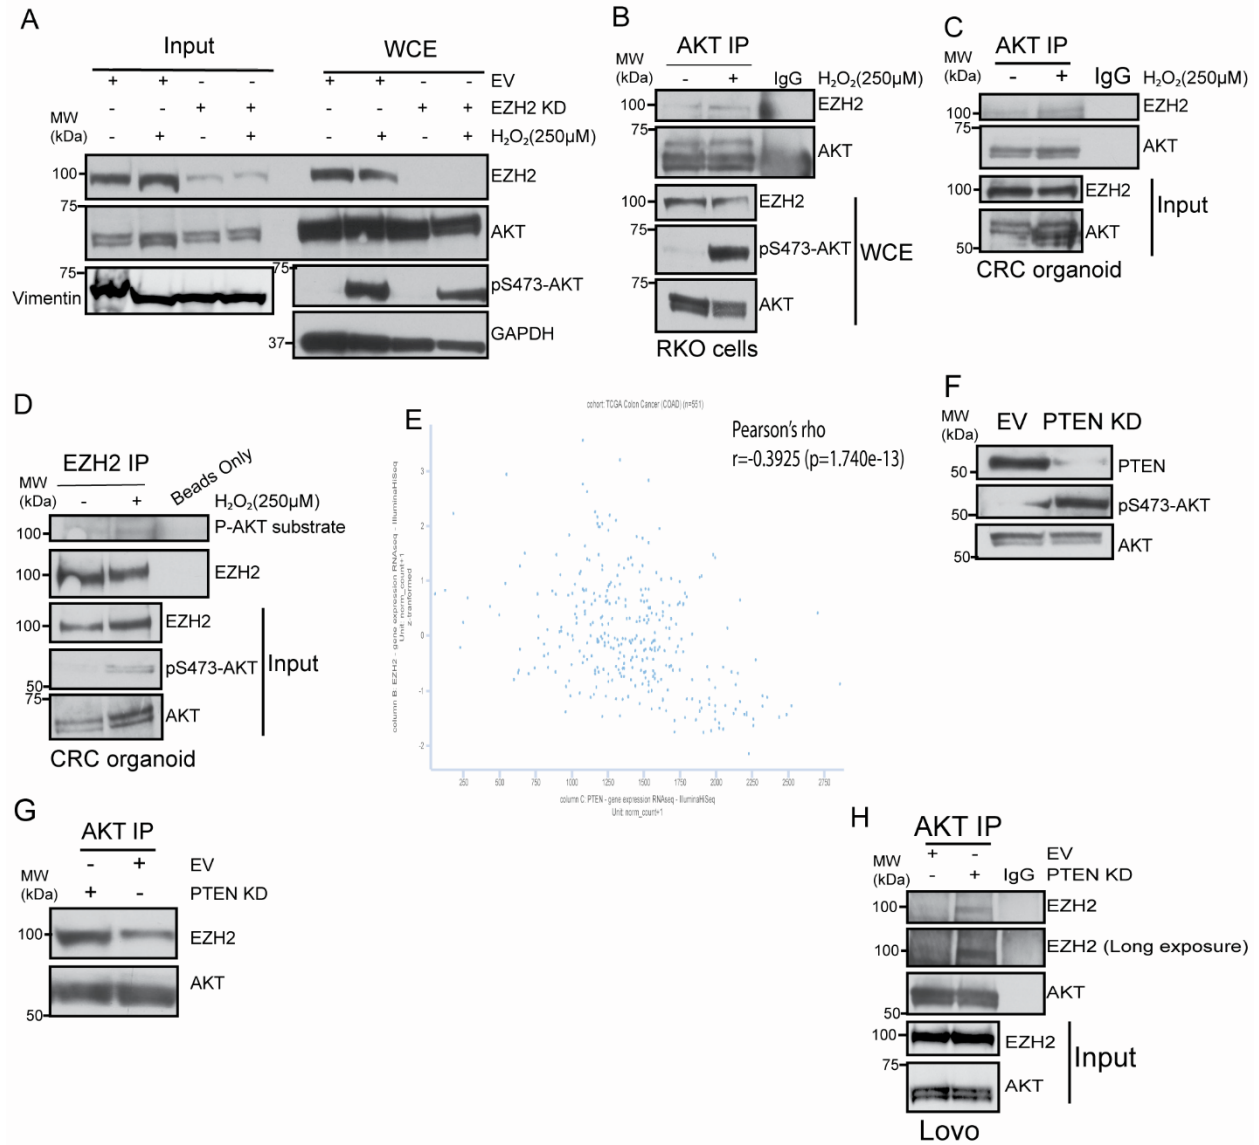

**Figure S1. AKT activation mediates EZH2 phosphorylation at Serine 21, Related to Figure 1.** **A.** Input is nuclear lysates used for IP in Figure 1A and whole cell extract (WCE) is total protein prior to cellular fractionation. **B** and **C.** Western blots of AKT immunoprecipitations (IP) performed using nuclear lysates prepared from RKO cells (**B**) and human CRC organoids (**C**) untreated or treated with 250 μM H<sub>2</sub>O<sub>2</sub> for 30 minutes. IP with IgG serves as a negative control. **D.** EZH2 IP using nuclear lysate prepared from human CRC organoids treated as in **C**. **E.** Correlation between EZH2 and PTEN expression in CRC was performed using UCSC xenabrowser. **F.** Western blot of whole cell extract prepared from PTEN knockdown (KD) and empty vector (EV) KD SW480 cells. **G.** AKT IP performed using nuclear lysates prepared from PTEN KD and EV KD SW480 cells. **H.** AKT IP performed using nuclear lysates prepared from PTEN KD and EV KD Lovo cells.

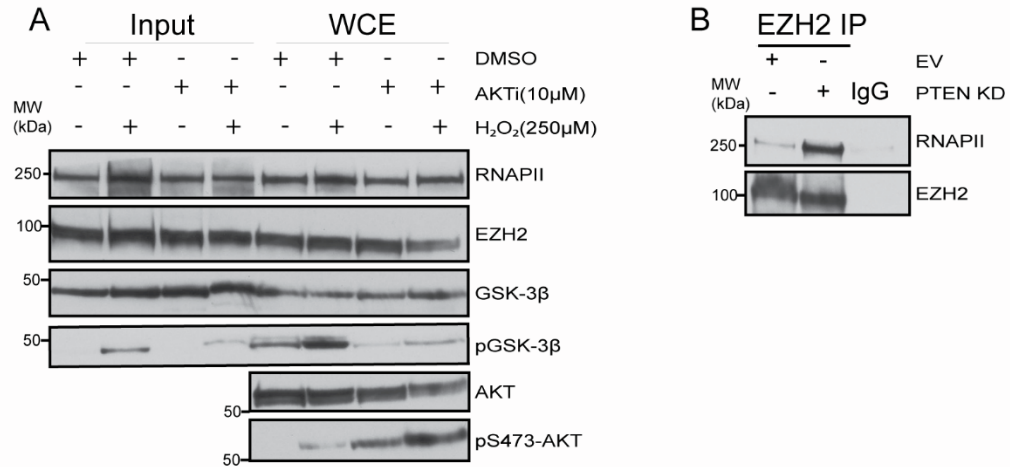

**Figure S2. Activation of AKT mediates EZH2 to interact with  $\beta$ -catenin and RNAPII, Related to Figure 2.** **A.** Western blots for whole cell extract (WCE) and nuclear lysates used for IP in 2B (input). **B.** EZH2 IP performed using nuclear lysates prepared from PTEN KD or EV SW480 cells. IP with IgG serves as a negative control.

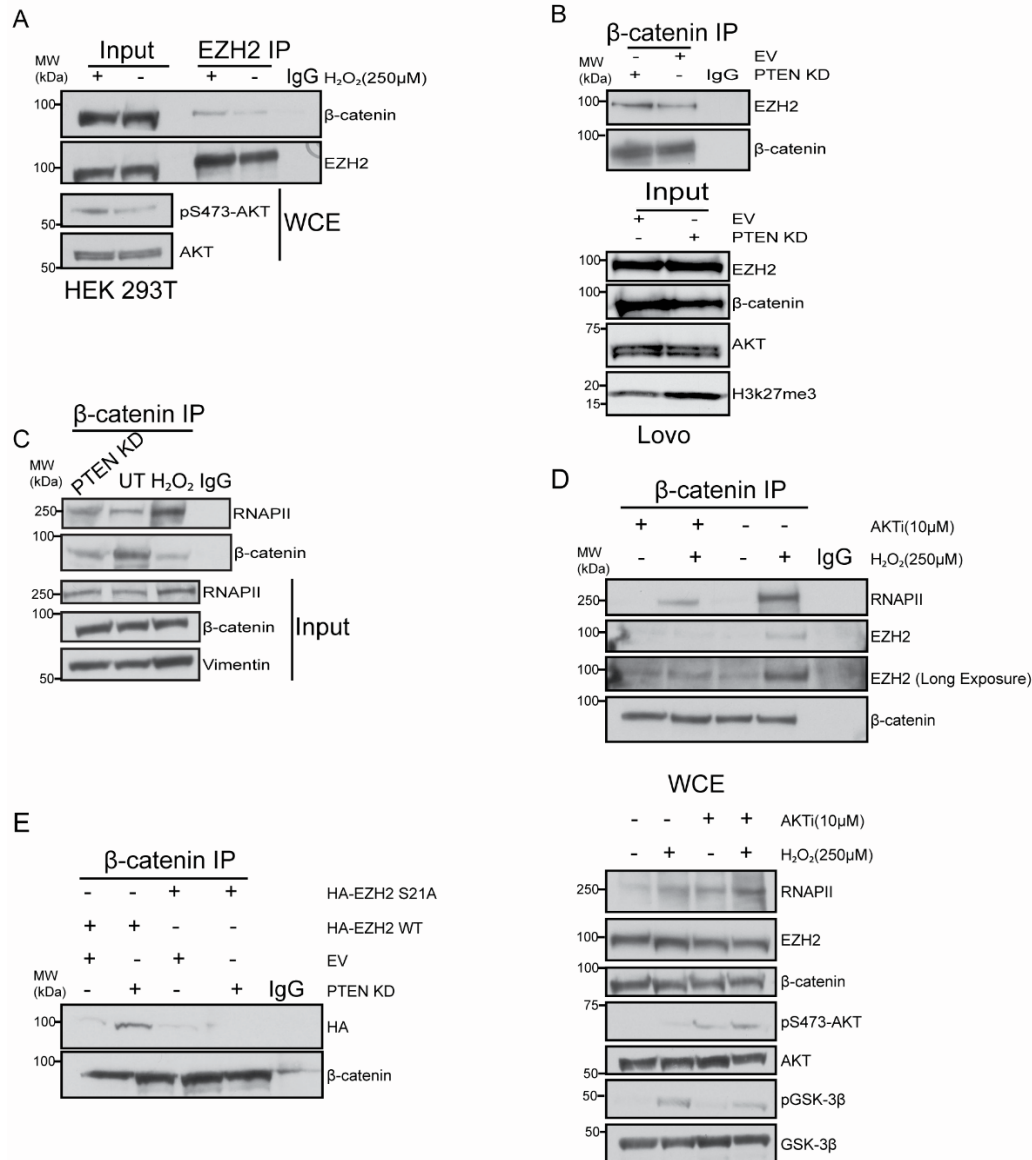

**Figure S3. EZH2 phosphorylation at S21 induces EZH2's interaction with β-catenin, Related to Figure 3.** **A.** Western blots of EZH2 immunoprecipitations (IPs) performed using nuclear lysates prepared from HEK 293T cells untreated or treated with 250 μM H<sub>2</sub>O<sub>2</sub> for 30 minutes. IP with IgG serves as a negative control. Input is nuclear lysates used for IPs and whole cell extract (WCE) is total protein prior to cellular fractionation. **B.** β-catenin IP performed from PTEN knockdown (KD) and empty vector (EV) Lovo cells. **C.** β-catenin IPs performed using nuclear lysate prepared from SW480 untreated and treated with 250 μM H<sub>2</sub>O<sub>2</sub> for 30 minutes and PTEN KD SW480 cells. Input is nuclear lysates used for IP. **D.** β-catenin IP performed using nuclear lysates prepared from SW480 cells untreated or treated with 10 μM AKT inhibitor (AKTi, GSK-690693) for 48 hours followed by no additional treatment or co-treatment with 250 μM H<sub>2</sub>O<sub>2</sub> for 30 minutes. **E.** Western blots of β-catenin IP performed using nuclear lysates prepared from HA-tagged EZH2 wildtype (WT) and HA-tagged EZH2 phospho-null (PN) S21A expressing EV and PTEN KD SW480 cells. IgG IP serves as a negative control.

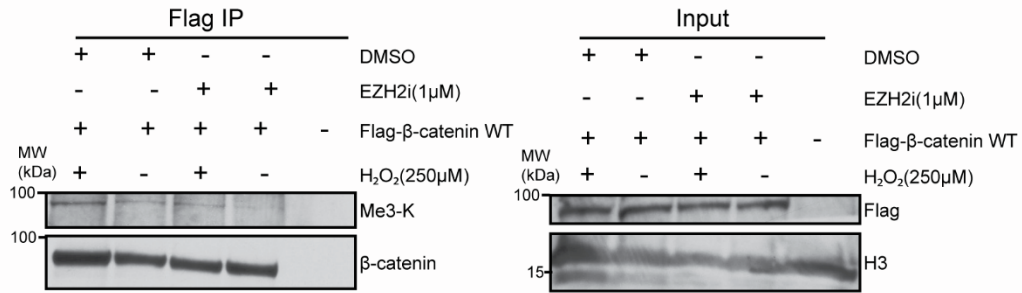

**Figure S4. H<sub>2</sub>O<sub>2</sub> induces  $\beta$ -catenin trimethylation in EZH2 dependent manner, Related to Figure 4.** Flag IP performed using nuclear lysates prepared from Flag-tagged  $\beta$ -catenin WT expressing SW480 cells treated with DMSO or EZH2 inhibitor (GSK 503, 1  $\mu$ M) for 72 hours without or with co-treatment with 250  $\mu$ M H<sub>2</sub>O<sub>2</sub> for 30 minutes. Input is nuclear lysates used for IP. Flag IP in cells not expressing Flag plasmids serve as a negative control.

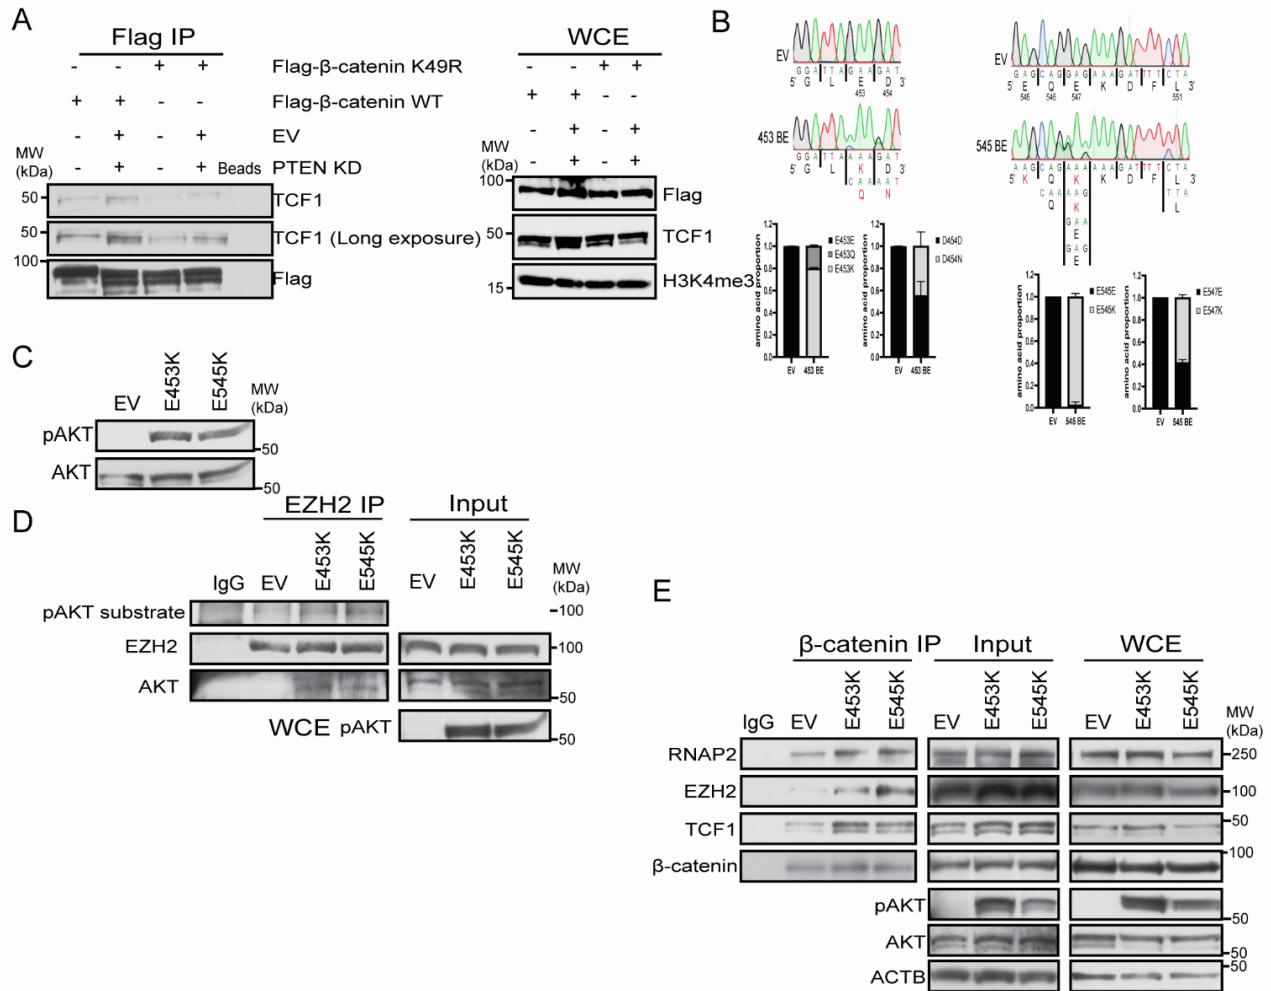

**Figure S5. AKT activation induces the interaction of β-catenin with RNPII and TCF1, Related to Figure 5.** **A.** Flag IP performed using nuclear lysates prepared from Flag-tagged β-catenin WT and Flag-tagged β-catenin K49R expressing PTEN KD or empty vector (EV) SW480 cells. Beads only IP serves as a negative control for IP. **B.** DNA sequencing of base-edited (BE) *PIK3CA* SW480 cells. Glutamic acid was replaced by lysine at 453 or 545 (E453K or E545K). **C.** Western blot of protein lysate prepared from EV SW480 and SW480 cells harboring the *PIK3CA* E453K or E545K mutation. **D.** EZH2 IP performed using nuclear lysate prepared from EV or SW480 with *PIK3CA* E453K or E545K mutation. Input is the nuclear lysate for IP, and IgG serves as a negative control. **E.** β-catenin IPs performed using nuclear lysate prepared as in D. Whole cell extract (WCE) is total protein prior to cellular fractionation.

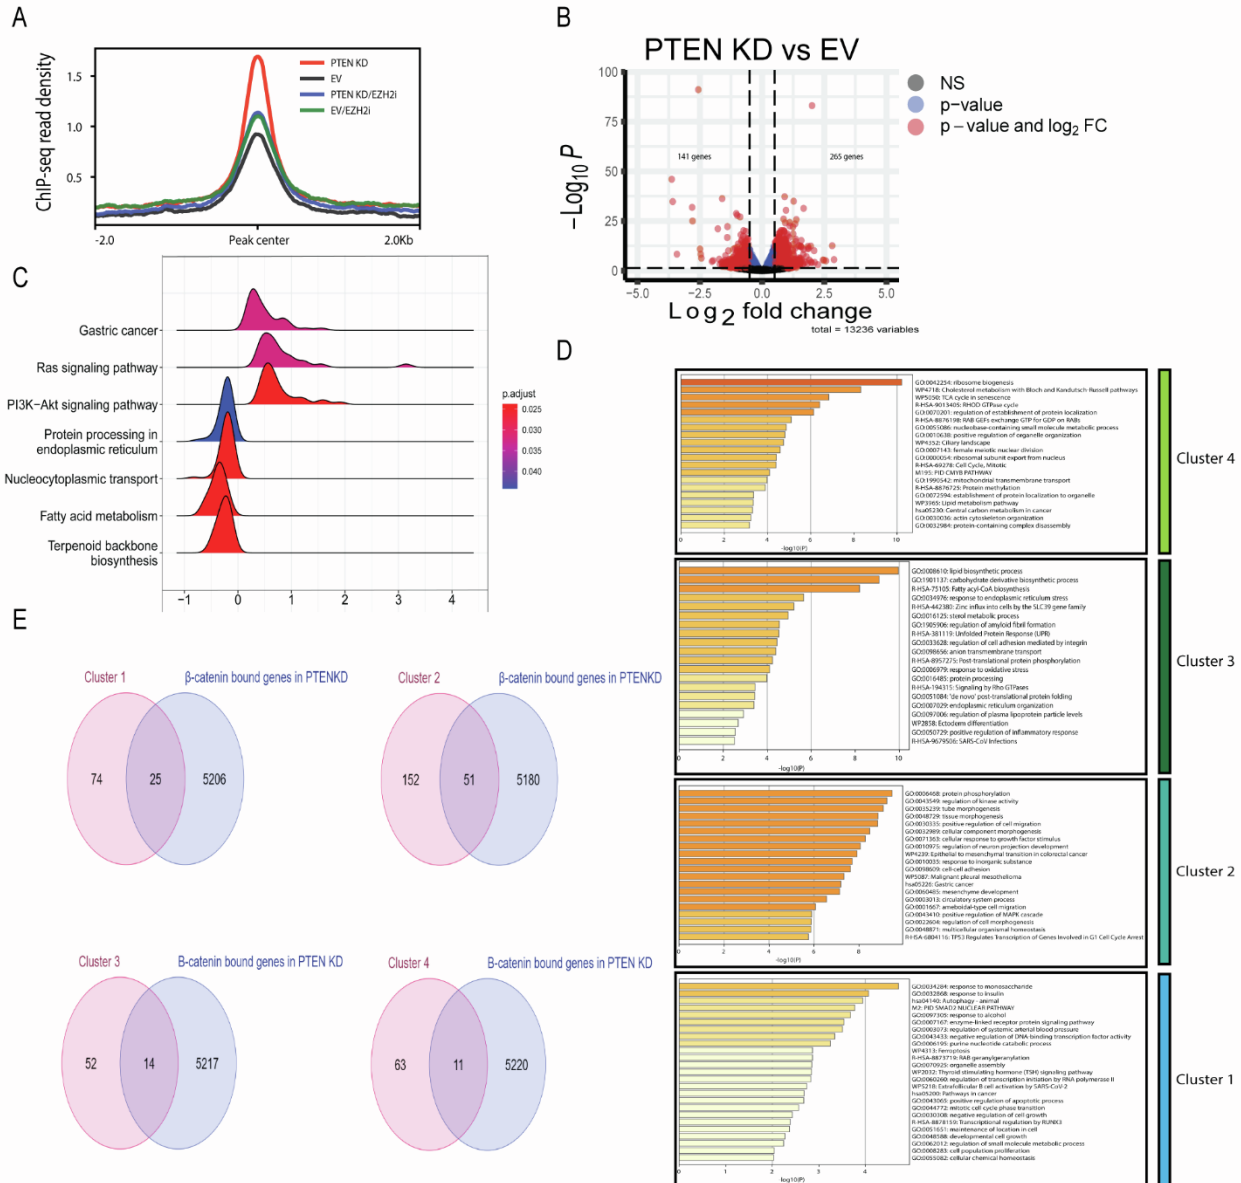

**Figure S6. PTEN knockdown increases  $\beta$ -catenin enrichment over the genome and regulates gene expression involved in migration and metabolic processes, Related to Figure 7. A.** Average ChIP-seq read intensity for all ChIP-seq peaks for a second independent biological replicate. **B.** Volcanoplot of differentially expressed genes (DEGs) in response to PTEN KD in SW480 cells. Dashed lines indicate  $|\log_2 \text{FC}| > 0.5$  and  $P < 0.05$ . **C.** Ridgeplot for DEGs in PTEN KD vs EV SW480 cells. **D.** Functional gene annotations for DEGs in clusters 1, 2, 3, and 4 from Figure 7D generated by Metascape. **E.** Vennplot for PTEN KD-up-regulated genes and FLAG- $\beta$ -catenin peaks specific to PTEN KD SW480 cells.

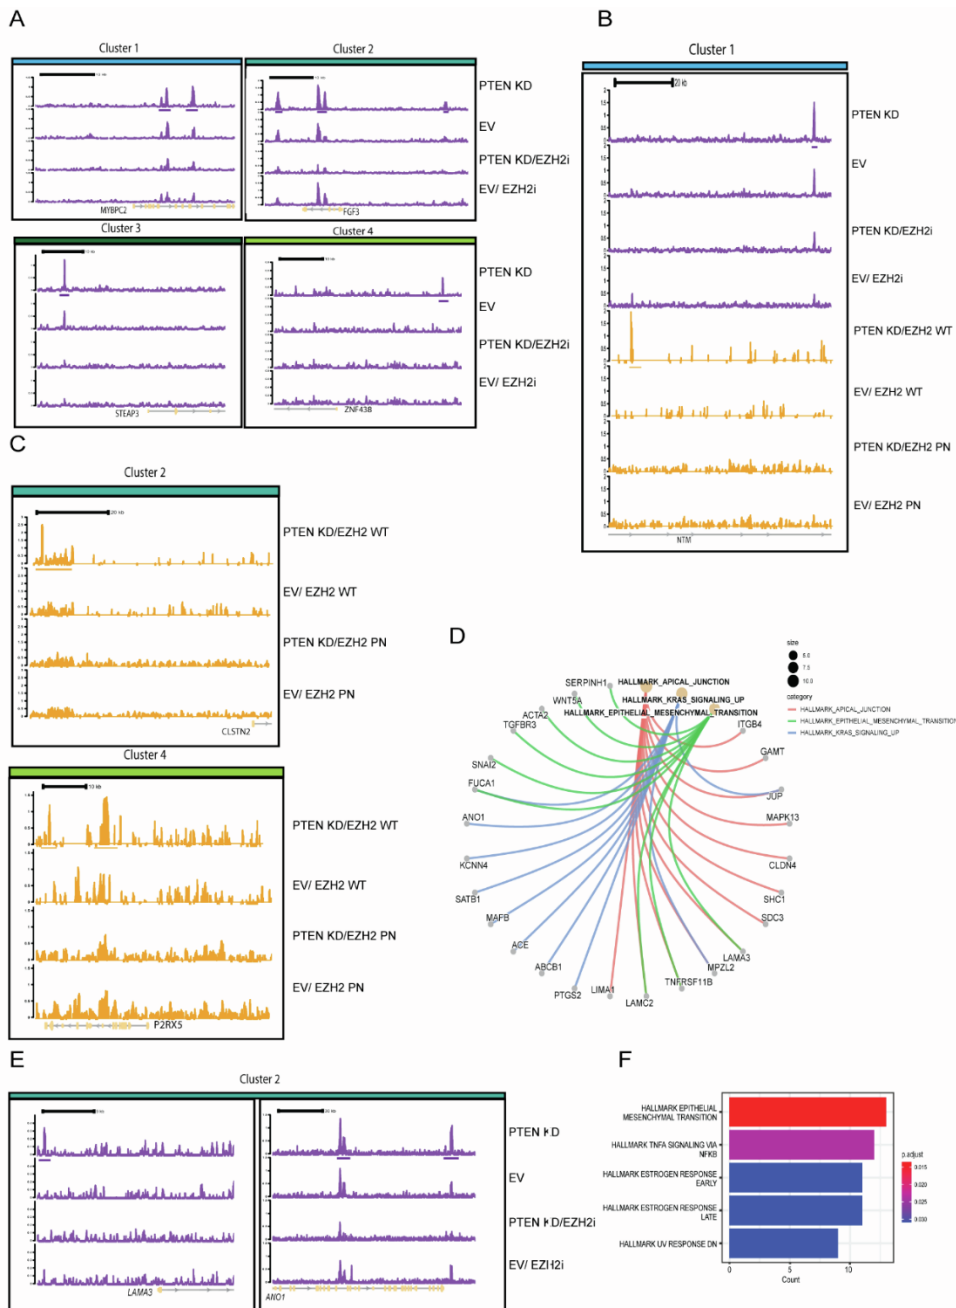

**Figure S7. PTEN KD increases  $\beta$ -catenin enrichment over the genome and expression of EMT related genes, Related to Figure 7. A.** FLAG- $\beta$ -catenin ChIP-seq gene tracks of representative differentially expressed genes (DEGs) in PTEN KD versus EV SW480 cells. **B.** FLAG- $\beta$ -catenin ChIP-seq and HA-EZH2 CUT&RUN gene tracks of representative DEGs in PTEN KD versus EV SW480 cells. **C.** HA-EZH2 CUT&RUN gene tracks of representative DEGs in PTEN KD versus EV SW480 cells. **D.** Centplot for the hallmark analysis in Figure 7B. **E.** FLAG- $\beta$ -catenin ChIP-seq gene tracks of representative hallmark genes. **F.** Barplot for the hallmark analysis for DEGs in EV SW480 untreated vs EV SW480 treated with EZH2 inhibitor (2  $\mu$ M) for 72 hours.



| Primers/oligos                                       | Sequences                                                     |
|------------------------------------------------------|---------------------------------------------------------------|
| E545KP3                                              | P-5'-CACCGCGTCAGTGATTTTCAGAGAG 3'                             |
| E545KP4                                              | P-5'-AAACCTCTCTGAAATCACTGACGC 3'                              |
| E453KP3                                              | P-5'-CACCGTCTTCTAATCCATGAGGTAC 3'                             |
| E453KP4                                              | P-5'-AAACGTACCTCATGGATTAGAAGAC 3'                             |
| E545K_seq F1                                         | CATCTGTGAATCCAGAGGGGAA                                        |
| E545K_seq R1                                         | TGCTGAGATCAGCCAAATTCA                                         |
| E453K_seq F1                                         | GGGGAAAAAGGAAAGAATGGGC                                        |
| E453K_seq R1                                         | GAGAGAAGGTTTACTGCCA                                           |
| E545K AP_F1                                          | AGCTTTGCAGGGATCATAAGG                                         |
| E545K AP_R1                                          | CGTATCACCAACAGCAGGGTA                                         |
| E453K AP_F1                                          | TACCTTGGGAGAGCTTCAGGA                                         |
| E453K AP_R1                                          | ACTCAGTGATTTGCCTTACCAGT                                       |
| 5' EZH2 with 1X HA tag                               | CTATGCATACCCATACGATGTTCCAGATTACGCTATGGGCC<br>AGACTGGGAAGAAATC |
| 3' EZH2 adds Pac1 site                               | GTGACATTAATTAATTATCAAGGGATTTCCATTTCTCTTTTCG                   |
| 5' PCR sewing primer for EZH2 point mutation in S21A | CGGAAGCGTGTAAGACAGAGTACATGCGACTG                              |
| 3' PCR sewing primer for EZH2 point mutation in S21A | CAGTCGCATGTACTCTGCTTTTACACGCTTCCG                             |
| 5' PCR sewing primer for EZH2 point mutation in S21D | CGGAAGCGTGTAAGACAGAGTACATGCGACTG                              |
| 3' PCR sewing primer for EZH2 point mutation in S21D | CAGTCGCATGTACTCGTCTTTTACACGCTTCCG                             |
| SNAI1 forward primer                                 | CTAGGCCCTGGCTGCTACA                                           |
| SNAI1 reverse primer                                 | TGGCACTGGTACTTCTTGACA                                         |
| SNAI2 forward primer                                 | CTCATCTTTGGGGCGAGTGA                                          |
| SNAI2 reverse primer                                 | CAATGGCATGGGGGTCTGAA                                          |
| FGF3 forward primer                                  | CAAGAGGGGACGACTCTATGC                                         |
| FGF3 reverse primer                                  | GGCCCCAGGCGTACTAGA                                            |
| RHOA forward primer                                  | CGTTAGTCCACGGTCTGGTC                                          |
| RHOA reverse primer                                  | ACCAGTTTCTTCCGGATGGC                                          |

**Table S1.** Sequences of oligos and primers used for PIK3CA base editing, plasmid construction and RT-qPCR, Related to STAR Methods.
